# Supplementary material for: A missense variant in Mitochondrial Amidoxime Reducing Component 1 gene and protection against liver disease
Source: PubMed Central journal article supplement (PMC7200007; doi:10.1371/journal.pgen.1008629), 2020-04-13
Supplement: pgen.1008629.s011.pdf [file pgen.1008629.s011.pdf]

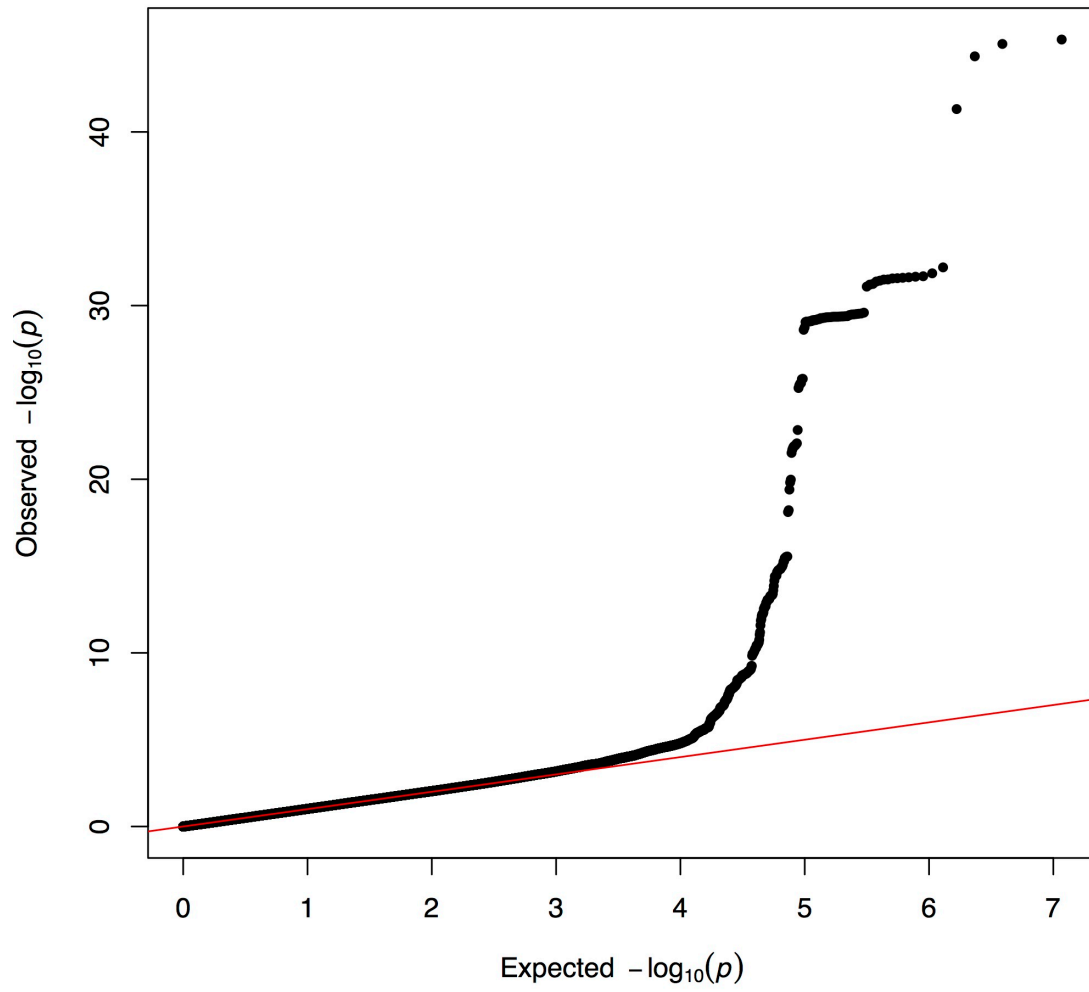

Supplementary Figure 3. QQ plot for genome wide analysis of cirrhosis. Lambda = 1.02
