# Supplementary material for: A missense variant in Mitochondrial Amidoxime Reducing Component 1 gene and protection against liver disease
Source: PubMed Central journal article supplement (PMC7200007; doi:10.1371/journal.pgen.1008629), 2020-04-13
Supplement: pgen.1008629.s014.pdf [file pgen.1008629.s014.pdf]

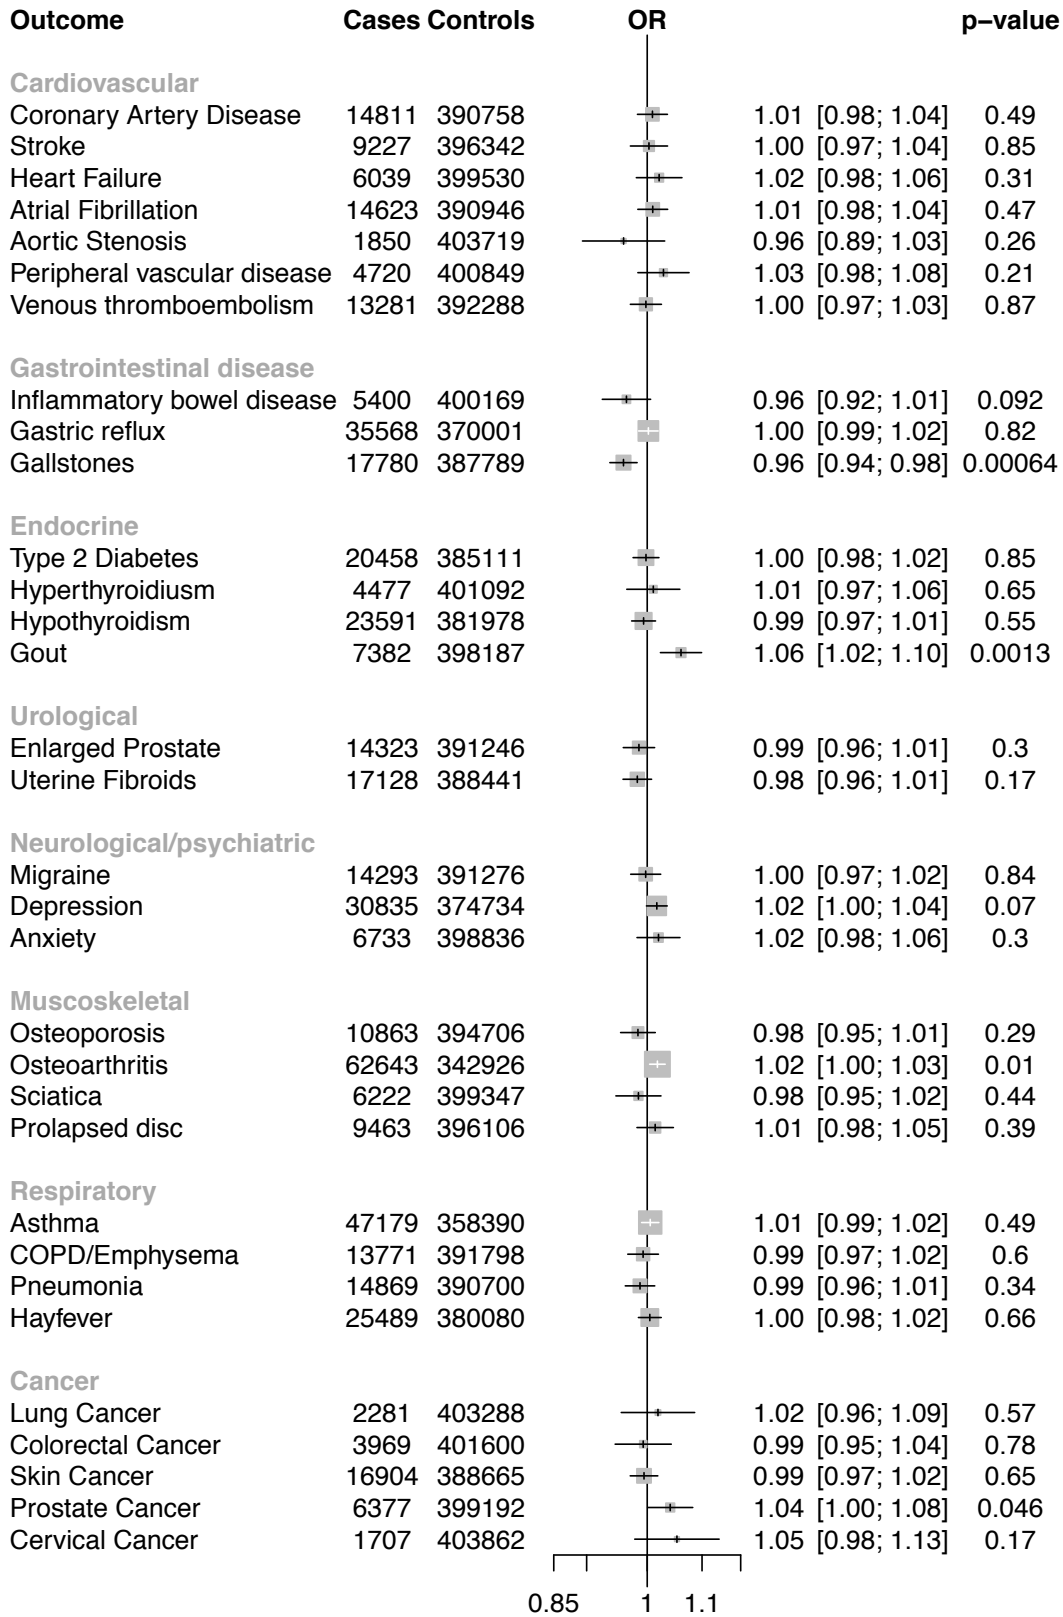

Supplementary Figure 6. Association of MARC A165T with other diseases in a phenome wide association study.
